# Supplementary material for: ADAM8 signaling drives neutrophil migration and ARDS severity
Source: PubMed Central journal article supplement (PMC8855804; doi:10.1172/jci.insight.149870), 2022-02-08
Supplement: jciinsight-7-149870-s033.pdf [file jciinsight-7-149870-s033.pdf]

## Supplementary Materials

Listing of the CAPSys Study group.

Fig. S1. ADAM8 is primarily expressed and released by neutrophils during acute inflammation.

Fig. S2. Functional analysis of Adam8<sup>+/+</sup> and Adam8<sup>-/-</sup> neutrophils.

Fig. S3. Rheologic parameters of cremaster venules analyzed in Figure 1A-D.

Fig. S4. ADAM8 levels during LPS-induced lung inflammation are dependent on neutrophils.

Fig. S5. Effect of ADAM8 ectodomain inhibition using a monoclonal antibody.

Fig. S6. SH3 domain inhibition attenuates the ADAM8-Myo1f interaction.

Fig. S7. Schematic model of drug actions on ADAM8 and Myo1f.

Fig. S8. Effect of ADAM8 inhibition on MPO release and phagocytosis in neutrophils.

Fig. S9. Proteolytic profiling of human neutrophils.

Fig. S10. PEPDab013 cleavage and ADAM8 protein levels in lung fluids of ARDS patients and healthy controls.

Fig. S11: PEPDab014 cleavage in lung fluids of ARDS patients and healthy controls.

Fig. S12. Lower power field magnifications of histologic sections.

Table S1. Surrogate endpoint scoring system for assessing disease severity in mice.

Table S2. Summary of clinical data of patients with ARDS due to pneumonia.

Table S3. Summary of clinical data of patients with ARDS due to Primary Graft Dysfunction (PGD).

Table S4. Table of Key Resources.

Video S1. Representative intravital microscopy sequences of the mouse cremaster muscle of ADAM8<sup>+/+</sup> and ADAM8<sup>-/-</sup> mice 2.5h after TNF $\alpha$  injection. Scale bar, 25 $\mu$ m.

Video S2. Representative 2-photon lung intravital microscopy of MRP8-Cre x mTmG mice. Neutrophils (MRP8<sup>+</sup>, green) were tracked over 30 Minutes in the lung (red) at baseline, or in mice treated with either the ADAM8 inhibitor BK-1361 or a control peptide during acute LPS-induced lung inflammation. Scale bar, 50 $\mu$ m.

## **Listing of the CAPSys Study group**

The following individuals and institutions constitute the CAPSys Study Group:

Petra Creutz, Aline leClaire, Agata Mikolajewska, Markus Vogtmann, Michaela Niebank, the ICU-Team, Carmen Garcia, Norbert Suttrop, Martin Witzenrath, Charité Universitätsmedizin Berlin, Medizinische Klinik m. S. Infektiologie und Pneumologie, Charitéplatz 1, 10117 Berlin; Sven Gläser, Henning Kahnert, Vivantes Klinikum Spandau, Kard., Pneum. und kons. Intensivmedizin, Neue Bergstraße 6, 13585 Berlin; Felix Rosenow, Universitätsklinikum Münster, Kardiologie 1, Albert-Schweitzer-Campus 1, 48149 Münster; Markus Scholz, Universität Leipzig, Institut für Medizinische Informatik, Statistik und Epidemiologie, Haertelstraße 16-18, 04107 Leipzig; Julio Vera-González, Universitätsklinikum Erlangen, Hautklinik, Hartmannstraße 14, 91052 Erlangen; Bernd Thomas Schmeck, Universitätsklinikum Gießen und Marburg, Standort Marburg, Klinik für Pneumologie, Hans-Meerwein-Straße 2, 35043 Marburg; Markus Löffler, Universität Leipzig, Institut für Medizinische Informatik, Statistik und Epidemiologie, Haertelstraße 16-18, 04107 Leipzig; Uwe Völker, Sven Hammerschmidt, Ernst-Moritz-Arndt-Universität Greifswald, Interfakultäres Institut für Genetik und Funktionelle Genomforschung, Friedrich-Ludwig-Jahnstraße 15a, 17475 Greifswald; Michael Bauer, Universitätsklinikum Jena, Klinik für Anästhesiologie und Intensivtherapie, Erlanger Allee 101, 07747 Jena; Michael Kiehntopf, Universitätsklinikum Jena, Integrierte Biobank, Erlanger Allee 101, 07747 Jena; Trinad Chakraborty, Justus-Liebig-Universität Gießen, Institut für Klinische Mikrobiologie, Frankfurter Straße 107, 35392 Gießen.

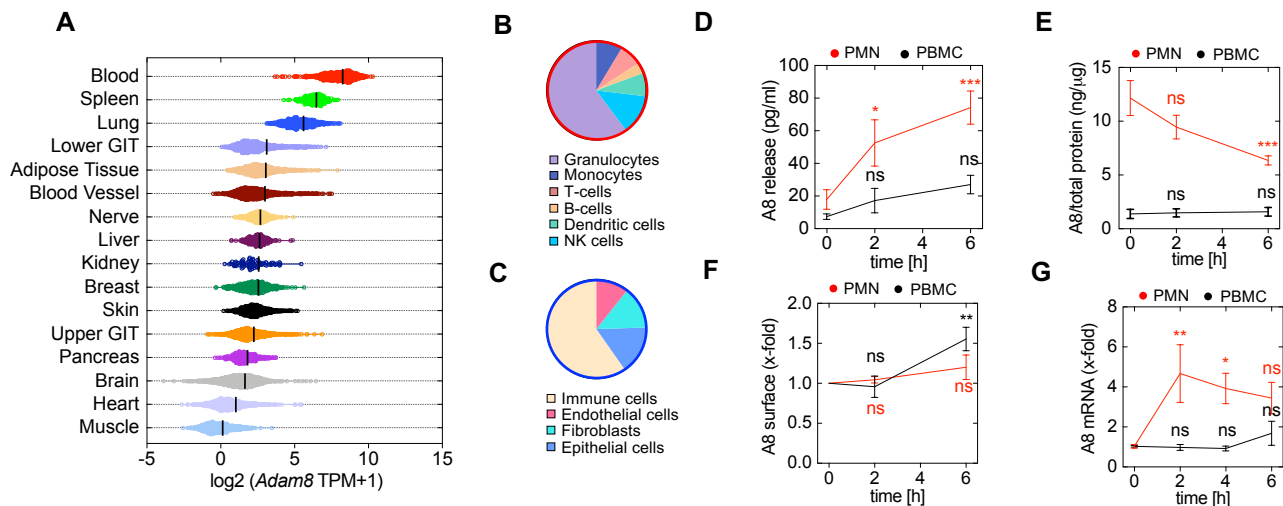

**Figure S1: ADAM8 is primarily expressed and released by neutrophils during acute inflammation.**

(A) Expression pattern of *ADAM8* across healthy tissues based on the GTEx human biospecimen reference database (GTEx Analysis Release V8, ENSG00000151651.15). *ADAM8* transcript levels are highest in whole blood (mean transcripts per million (TPM): 304.4), followed by the spleen (mean TPM: 89.03) and the lung (mean TPM: 49.03). (B) Among the cells in the blood, *ADAM8* was most enriched in granulocytes. (C) Within normal lung tissue, *ADAM8* is primarily expressed in immune cells, including macrophages, granulocytes and lymphocytes. To compare the *ADAM8* levels among the main immune effectors during inflammatory activation, we isolated human PMNs and PBMCs, and assessed (D) *ADAM8* release, (E) whole cell protein, (F) surface and (G) mRNA expression over time at baseline and following stimulation with  $TNF\alpha$ . Data are given as mean  $\pm$  SEM of 4 biological replicates; \*,  $p < 0.05$ ; \*\*,  $p < 0.01$ ; \*\*\*,  $p < 0.001$ ; two-way ANOVA followed by Sidak's multiple comparison test. Activation of PMNs resulted in the rapid release of soluble *ADAM8* into the supernatant, with a corresponding decline in cell-associated *ADAM8*. In contrast,  $TNF\alpha$ -induced *ADAM8* secretion by monocytic immune cells was not significant. The surface expression of *ADAM8* remained stable in PMNs, whereas PBMCs showed an increase only at 6 hours after  $TNF\alpha$  stimulation. *ADAM8* mRNA expression was induced early after stimulation in neutrophils and showed no significant change in PBMCs. Together, these data suggest that PMNs are the major source of *ADAM8* following acute immune activation, while mononuclear cells exhibit a stable expression pattern in the early inflammatory phase.

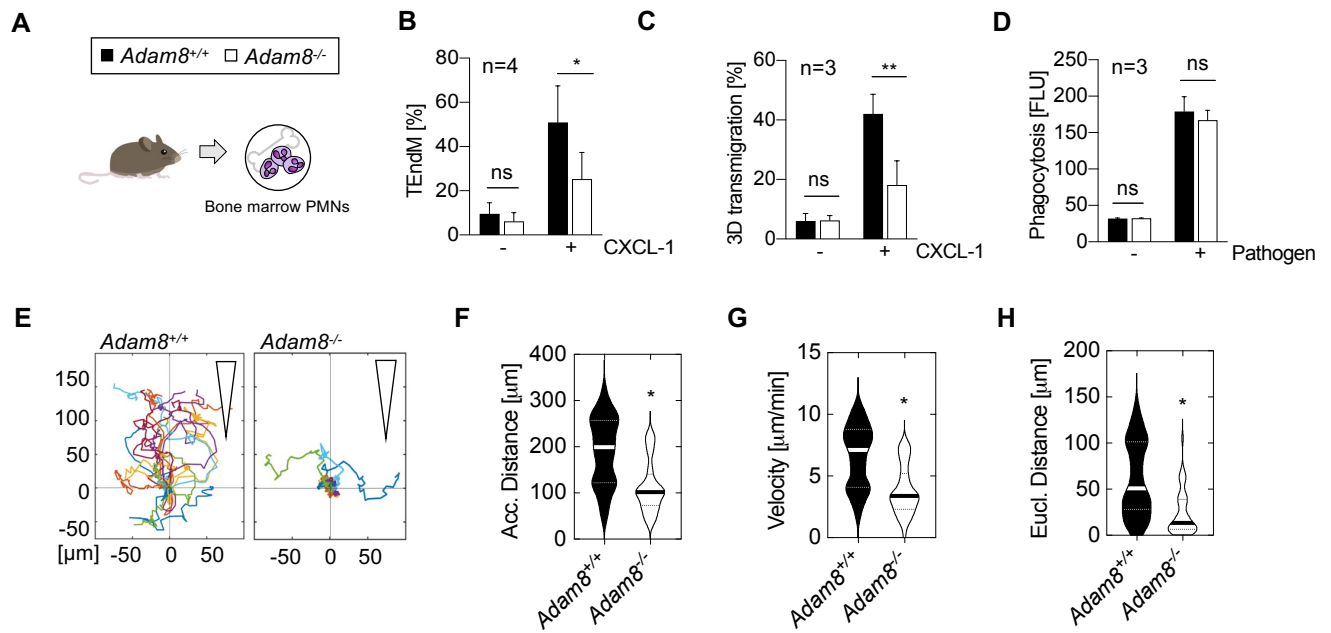

**Figure S2: Functional analysis of *Adam8*<sup>+/+</sup> and *Adam8*<sup>-/-</sup> neutrophils.** To investigate the role of ADAM8 in neutrophil migration, we used transwell and 3D gel-matrix based *in vitro* assays. **(A)** Bone marrow neutrophils from *Adam8* deficient mice (*Adam8*<sup>-/-</sup>, white bars) or littermate controls (*Adam8*<sup>+/+</sup>, black bars) were isolated and investigated *in vitro*. **(B)** Transmigration of *Adam8*<sup>+/+</sup> (black bars) and *Adam8*<sup>-/-</sup> (white bars) neutrophils across an endothelial monolayer (TEndM) or **(C)** 3D transmigration across matrigel-coated transwells stimulated by CXCL-1 (100 ng/mL). Percentage of transmigrated cells for **(B-C)** was calculated based on the number of neutrophils added to the transwell. Transmigration defects of *Adam8*<sup>-/-</sup> neutrophils indicate that ADAM8 is instrumental for the passage of neutrophils through tissue barriers. **(D)** Phagocytosis of pathogen particles (*E. coli*) labeled with pH-sensitive pHrodo (FLU, fluorescent units). Data for **(A-D)** are means ± SD; \*, p < 0.01; \*\*, p < 0.005; two-way ANOVA and Sidak's multiple comparison test. **(E-H)** To investigate motility in interstitial spaces, 3D chemotaxis assays on microslides (μ-Slides) were performed and the velocities of *Adam8*<sup>+/+</sup> and *Adam8*<sup>-/-</sup> neutrophils towards a CXCL-1 gradient in matrigel were analyzed. **(E)** 3D chemotactic migration (matrigel 200μg/ml) of *Adam8*<sup>+/+</sup> and *Adam8*<sup>-/-</sup> neutrophils towards a CXCL-1 (100 ng/mL) gradient using chemotaxis μ-slides. Representative trajectory plots are shown, the triangle indicates the orientation of the gradient. **(F)** Violin plots of mean accumulated distance (in μm), **(G)** velocity (μm/min) and **(H)** Euclidian distance (in μm) of *Adam8*<sup>+/+</sup> and *Adam8*<sup>-/-</sup> neutrophils. Data correspond to 3 independent experiments, 30 cells per experiment were analyzed. \*, p < 0.01, Student's t-test.

|                             | Mice | Venules | Diameter [ $\mu\text{m}$ ] | $V_{\text{centerline}}$ [ $\mu\text{m s}^{-1}$ ] | Shear rate [ $\text{s}^{-1}$ ] | WBC [ $\mu\text{l}^{-1}$ blood] |
|-----------------------------|------|---------|----------------------------|--------------------------------------------------|--------------------------------|---------------------------------|
| <i>Adam8</i> <sup>+/+</sup> | 5    | 19      | 29 $\pm$ 4                 | 3.8 $\pm$ 0.26                                   | 2.4 $\pm$ 0.16                 | 4734 $\pm$ 678                  |
| <i>Adam8</i> <sup>-/-</sup> | 6    | 22      | 31 $\pm$ 6                 | 3.8 $\pm$ 0.16                                   | 2.4 $\pm$ 0.10                 | 5541 $\pm$ 935                  |
| p-value                     |      |         | ns (0.13)                  | ns (0.90)                                        | ns (0.90)                      | ns (0.12)                       |

**Figure S3: Rheologic parameters of cremaster venules analyzed in Figure 1A-D.**

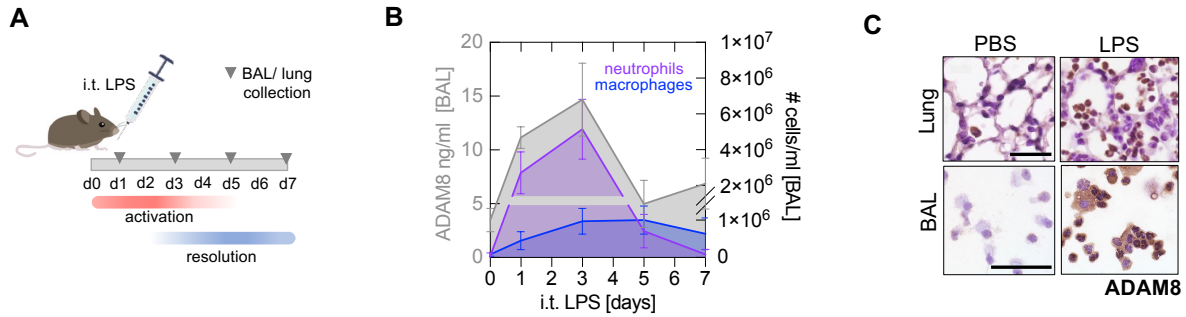

**Figure S4: ADAM8 levels during LPS-induced lung inflammation are dependent on neutrophils.** (A) To determine ADAM8 expression during acute pulmonary inflammation *in vivo*, we challenged mice with intratracheal (i.t) instillations of lipopolysaccharide (LPS) and collected BAL samples across the activation and resolution phases of inflammation. Mice were sacrificed on days (d) 1, 3, 5, and 7 after LPS challenge (grey bar, grey triangles). (B) Soluble ADAM8 levels (grey) were temporally associated with neutrophil accumulation (violet) in the BAL during the course of LPS-induced lung inflammation ( $r=0.8236$ ,  $p<0.0001$ ), whereas no relationship was detected between ADAM8 and macrophage (blue) recruitment ( $r=0.1824$ ,  $p=0.3529$ ),  $n=4-6$  per timepoint. (C) Leukocytes recruited into the alveolar space following LPS instillation in mice are immunopositive for ADAM8, whereas the lung epithelium and endothelium lacked ADAM8 staining. Upper panel, lung tissue: lower panel, BAL cytospin. Scale bar, 25  $\mu\text{m}$ .

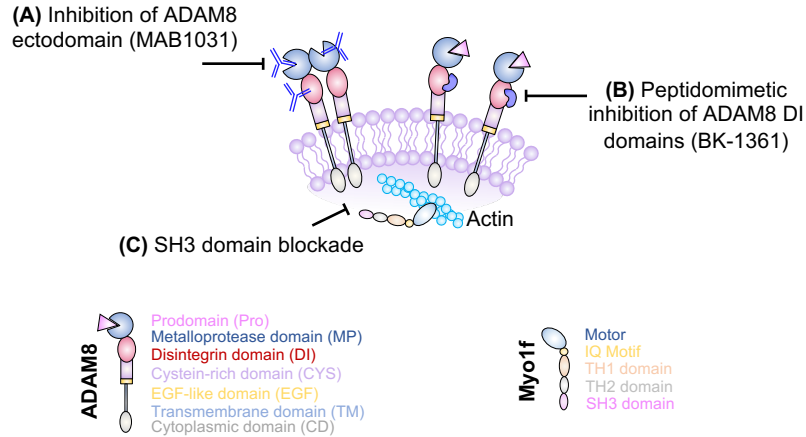

**Figure S5: Schematic model of drug actions on ADAM8 and Myo1f.** (A) The monoclonal antibody MAB1031 (R&D) is directed against the ectodomain of ADAM8 (aa 201-497) and has been shown to inhibit the catalytic activity of ADAM8 previously (48). (B) The cyclic peptide BK-1361 is a small peptidomimetic that interacts with the ‘KDX’ motif in the integrin-binding-loop of human and mouse ADAM8, which efficiently blocks ADAM8 multimerization and subsequent auto-activation (33). (C) Blocking of SH3 domains (49) could prevent the intracellular interaction of ADAM8 and Myo1f. Protein domains of ADAM8 and Myo1f (lower panels).



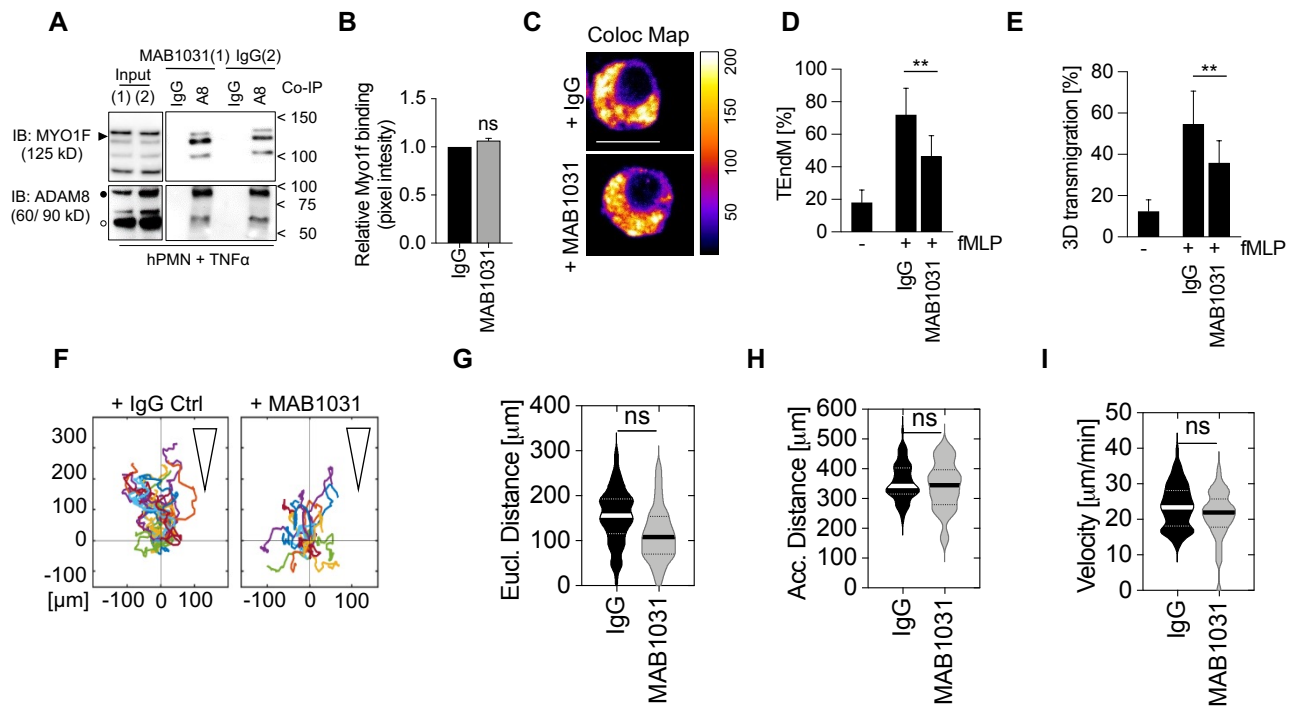

**Figure S6: Effect of ADAM8 ectodomain inhibition using a monoclonal antibody.** (A) Co-IP of activated human neutrophils treated with either an ADAM8 activity blocking antibody (MAB1031) or control IgG (IgG) during TNF $\alpha$  stimulation. (B) Relative pixel intensity of Myo1f co-precipitated with ADAM8 normalized to input using ImageJ Software, ns, not significant, Student's t-test. (C) Colocalization map (Coloc Map) of human neutrophils treated with MAB1031 or IgG as described in D. Scale bar, 10  $\mu$ M. (D) Effect of MAB1031 on fMLP-induced transendothelial migration of human neutrophils (n=4 donors) and (E) migration across a 3D gel matrix (matrigel 200 $\mu$ g/ml), respectively (n=3 donors). Data are given as mean  $\pm$  SD, stars indicate \*\*, p < 0.002; Student's t-test. (F) 3D chemotactic migration (matrigel 200 $\mu$ g/ml) of human neutrophils preincubated with MAB1031 or control (IgG) toward an IL-8 (1  $\mu$ g/mL) gradient using chemotaxis  $\mu$ -slides. Representative trajectory plots are shown, triangles indicate orientation of the gradient. Violin plots of (G) mean Euclidian distance, (H) accumulated distance and (I) migration velocity of human neutrophils preincubated with MAB1031 (grey) or IgG control (black). Data correspond to 3 independent experiments, 30 cells per experiment were analyzed. ns, not significant; Student's t-test.

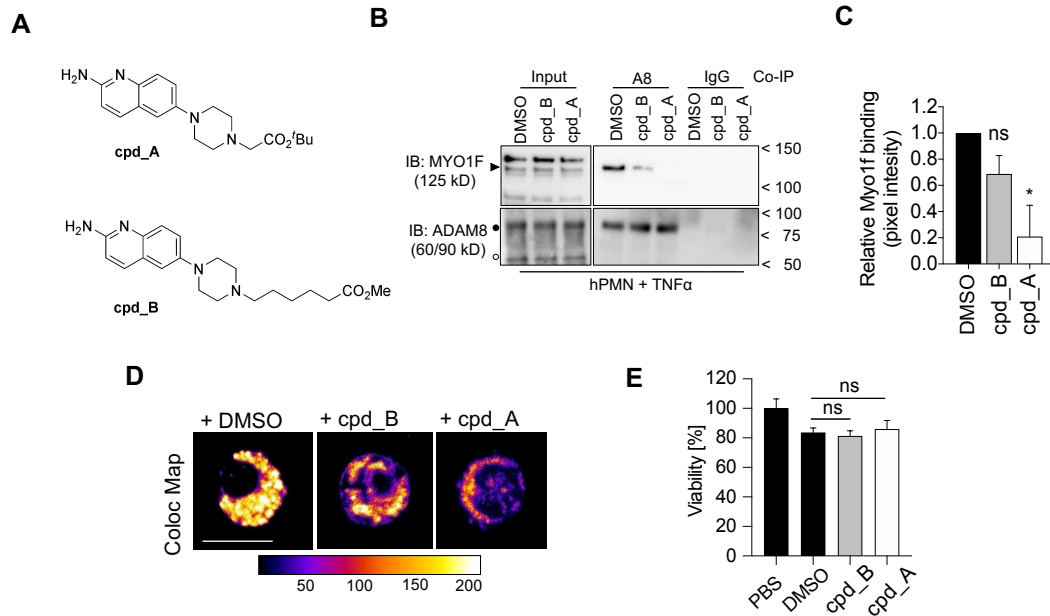

**Figure S7: SH3 domain inhibition attenuates the ADAM8-Myo1f interaction.** (A) Chemical structure of two inhibitors with the potential to block SH3 domains [cpd\_A, compound A, cpd\_B, compound B, described previously (49)]. (B) Human neutrophils were treated with 10 $\mu$ M cpd\_A, cpd\_B or DMSO as vehicle control during TNF $\alpha$  stimulation; representative immunoblot of ADAM8/Myo1f Co-IP is shown. (C) Corresponding densitometric analysis of Myo1f binding to ADAM8 normalized to input using ImageJ Software. \*  $p < 0.05$ , ns; not significant, one-way ANOVA followed by Tukey's multiple comparison test. (D) Colocalization map of human neutrophils treated with SH3 inhibitors/vehicle as described in (A) stained for Myo1f and ADAM8. (E) MTT viability assay of primary human neutrophils incubated with 10 $\mu$ M cpd\_A, cpd\_B, vehicle control (DMSO) or PBS for the duration of functional assays,  $n=3$ . ns; not significant, one-way ANOVA followed by Tukey's multiple comparison test.

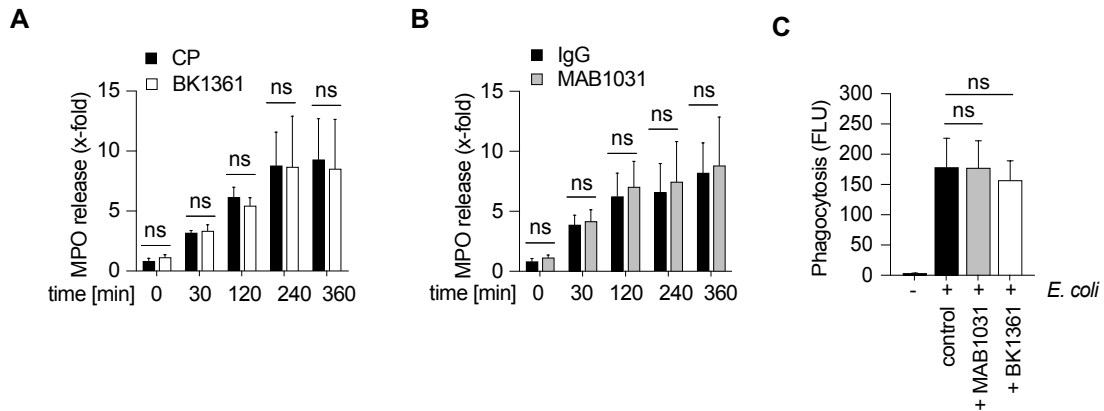

**Figure S8: Effect of ADAM8 inhibition on MPO release and phagocytosis in neutrophils.** MPO release by primary human neutrophils stimulated with TNF $\alpha$  over time quantified by ELISA. Pharmacological ADAM8 inhibition with **(A)** BK-1361 (white bars) or **(B)** MAB1031 (grey bars) was not altered compared to respective controls (black bars). n=3, ns, not significant; 2-way ANOVA followed by Sidak's multiple comparison test. **(C)** Phagocytic activity of PMNs measured by the internalization of pHrodo-conjugated *E.coli* bioparticles (FLU, fluorescent units), respectively. n=3, ns, not significant; 1-way ANOVA followed by Sidak's multiple comparison test.

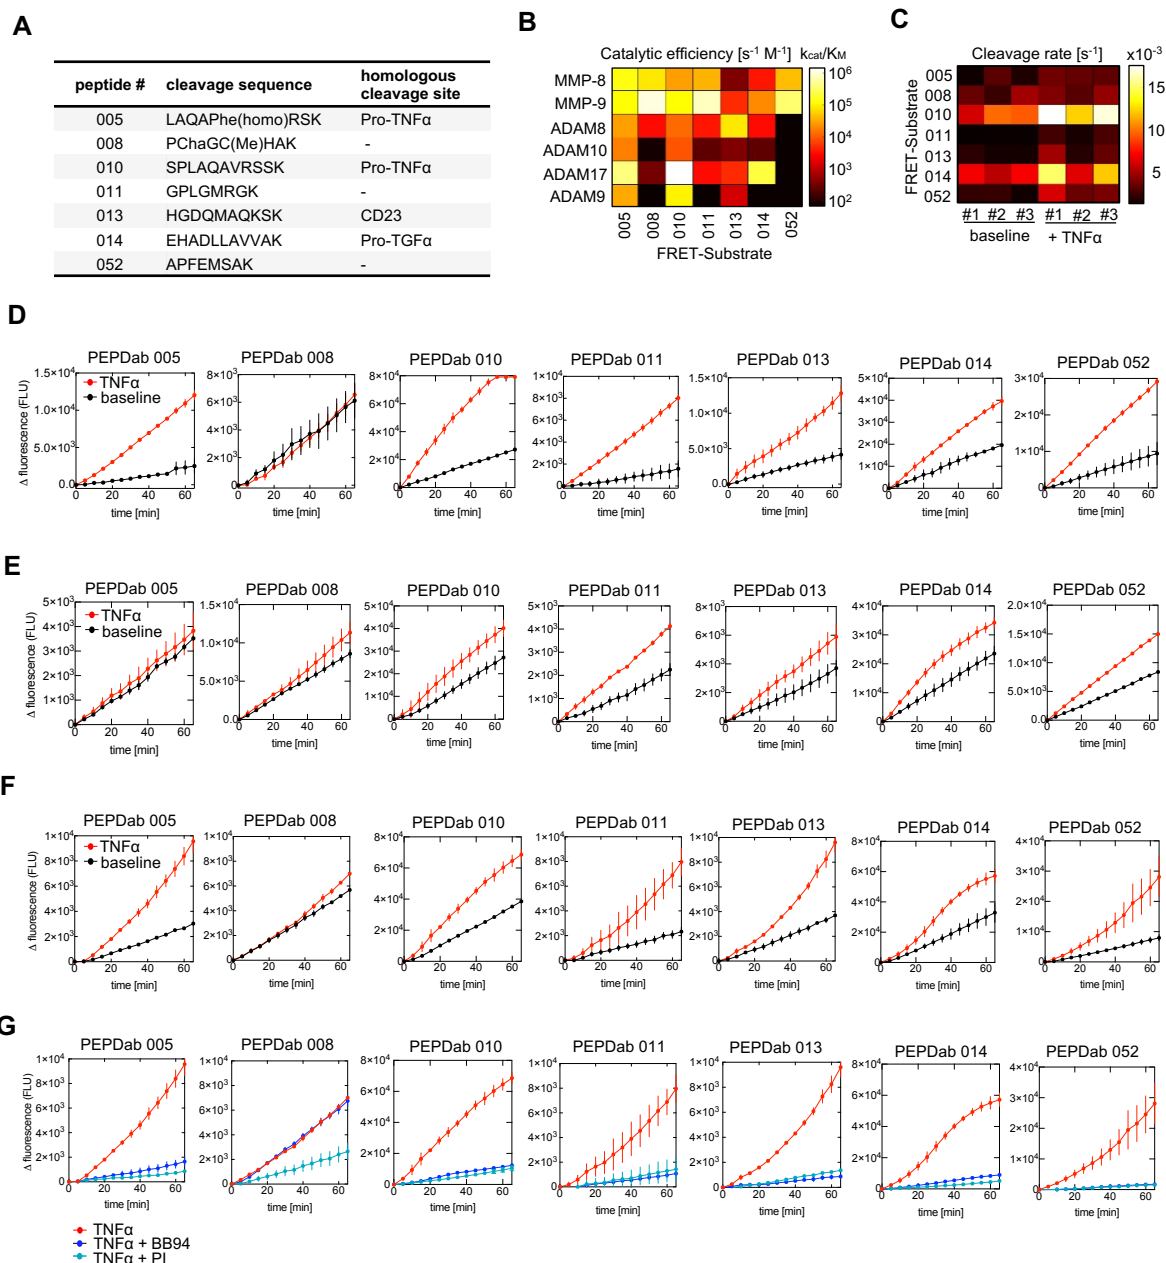

**Figure S9: Proteolytic profiling of human neutrophils.** (A) Cleavage sequences of fluorescent substrates and, if applicable, homologous cleavage sites in endogenous substrates. (B) Standard table of catalytic efficiencies of recombinant MMP-8, MMP-9, ADAM8, ADAM9, ADAM10 and ADAM17 for FRET-based peptide substrates 005, 008, 010, 011, 013, 014 and 052, as described previously (Miller et al., 2011). (C) Substrate cleavage patterns of isolated human neutrophils obtained from three donors at baseline and after stimulation with TNF $\alpha$  (20ng/ml) were calculated from (D-F) using a non-linear kinetic model. (D-F) Time-lapse fluorimetry (fluorescence change of time) of unstimulated (black) and stimulated (red) human neutrophils using a panel of seven FRET-based peptide substrates (PEPDab 005, 008, 010, 013, 014 and 052, Biozyme Inc., Apex, NC) to deduce a profile of specific MMP and ADAM proteolytic activities. (G) Proteolytic activities were reduced by  $\sim 90\%$  using cOMplete Protease Inhibitor (green) with broad inhibitory specificity against serine, cysteine, and metalloproteases, and blocked by  $\sim 70-90\%$  using the broad-spectrum metalloproteinase inhibitor batimastat BB-94 (blue). Representative time-lapse data are plotted for TNF $\alpha$  stimulated neutrophils from (F) and respective inhibitors treatments.

**Figure S9**

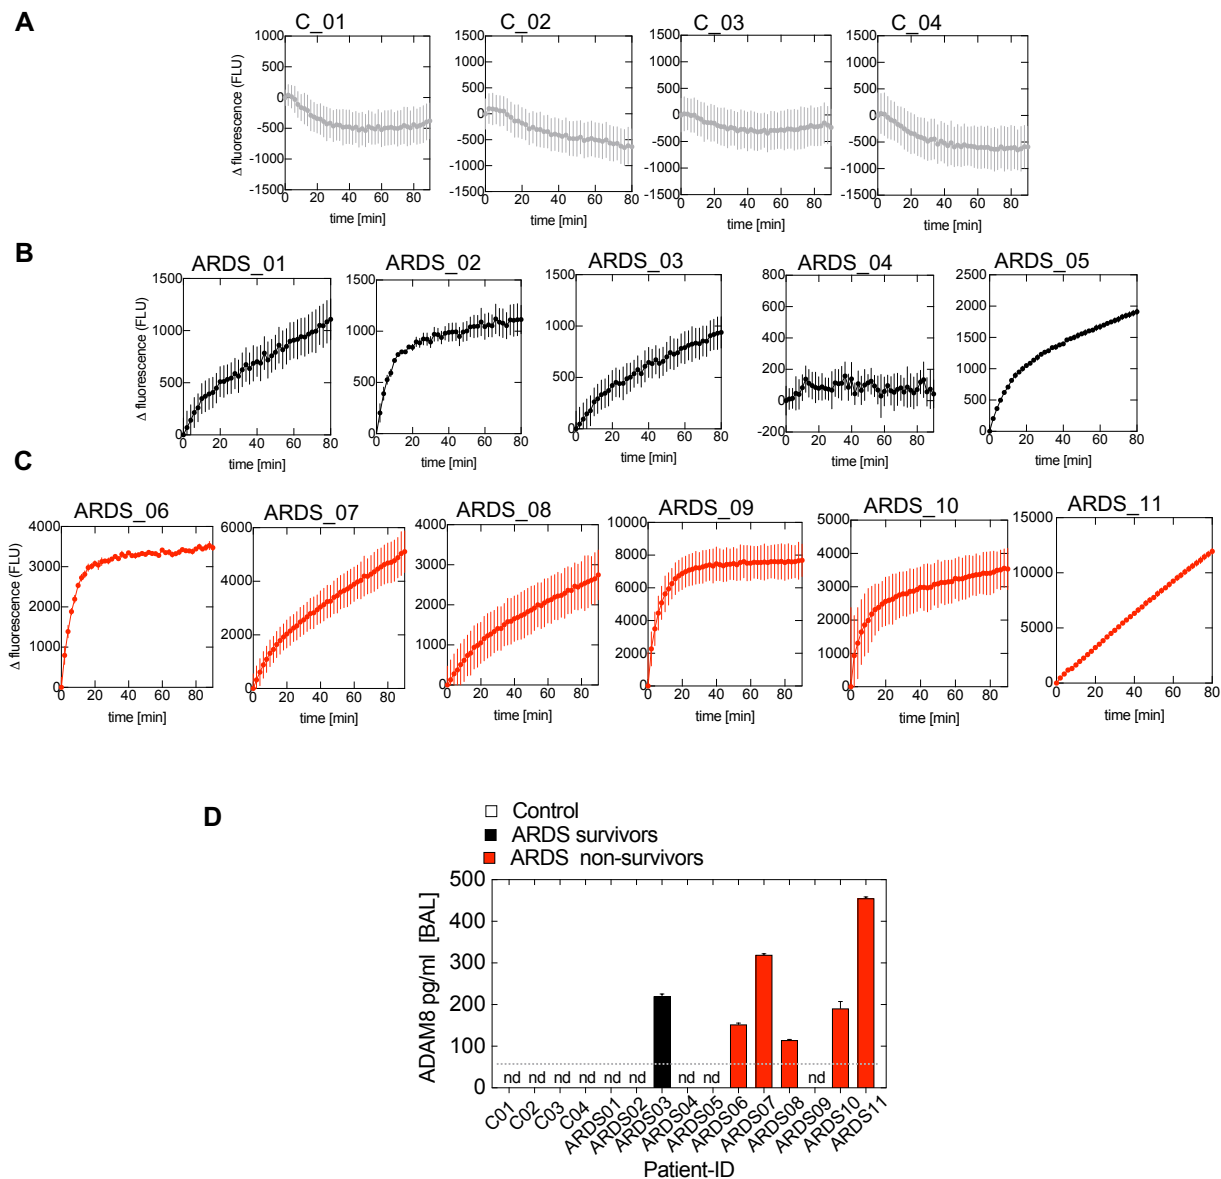

**Figure S10: PEPDab013 cleavage and ADAM8 protein levels in lung fluids of ARDS patients and healthy controls.** Time-lapse fluorimetry (fluorescence change over time) of (A) control BAL (grey), (B) BAL of ARDS survivors (black) and (C) BAL of ARDS non-survivors (red) using the moderately ADAM8 specific substrate PEPDab 013. (D) Detection of soluble ADAM8 in BAL samples of control (white), ARDS survivors (black) and ARDS non-survivors using ELISA, respectively. Dotted grey line, sensitivity cut-off 50pg/ml; nd, not detectable.

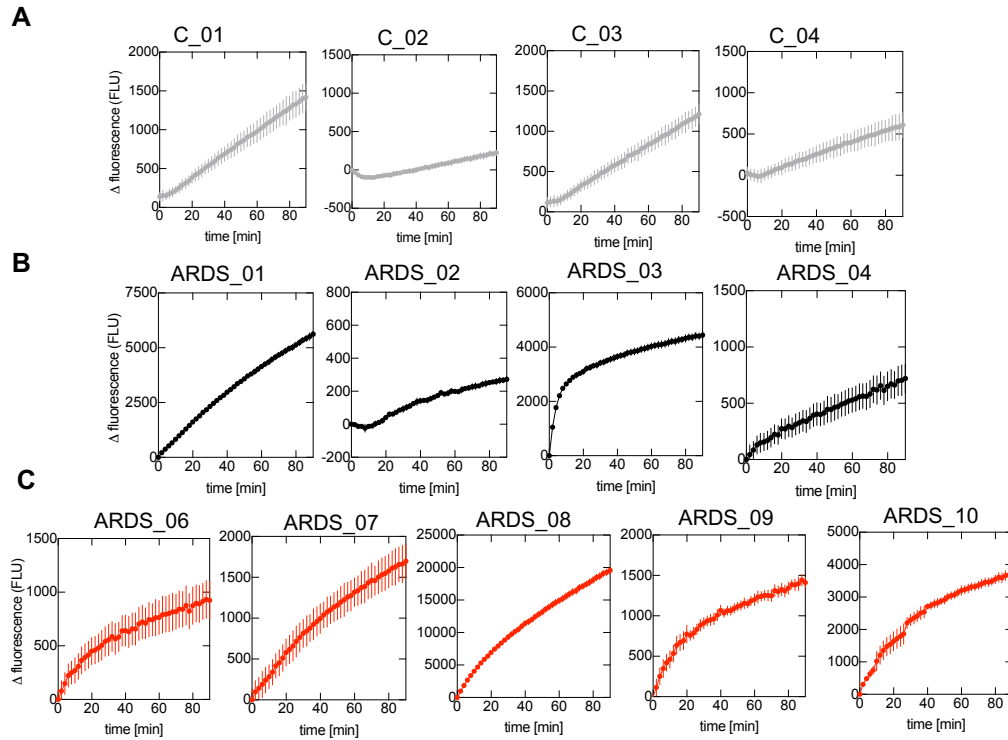

**Figure S11: PEPDab014 cleavage in lung fluids of ARDS patients and healthy controls.** Time-lapse fluorimetry (fluorescence change over time) of (A) control BAL (grey), (B) BAL of ARDS survivors (black) and (C) BAL of ARDS non-survivors (red) using the moderately ADAM17 specific substrate PEPDab014.

**Lung tissue (*P.a.*, *Adam8*<sup>-/-</sup>)**

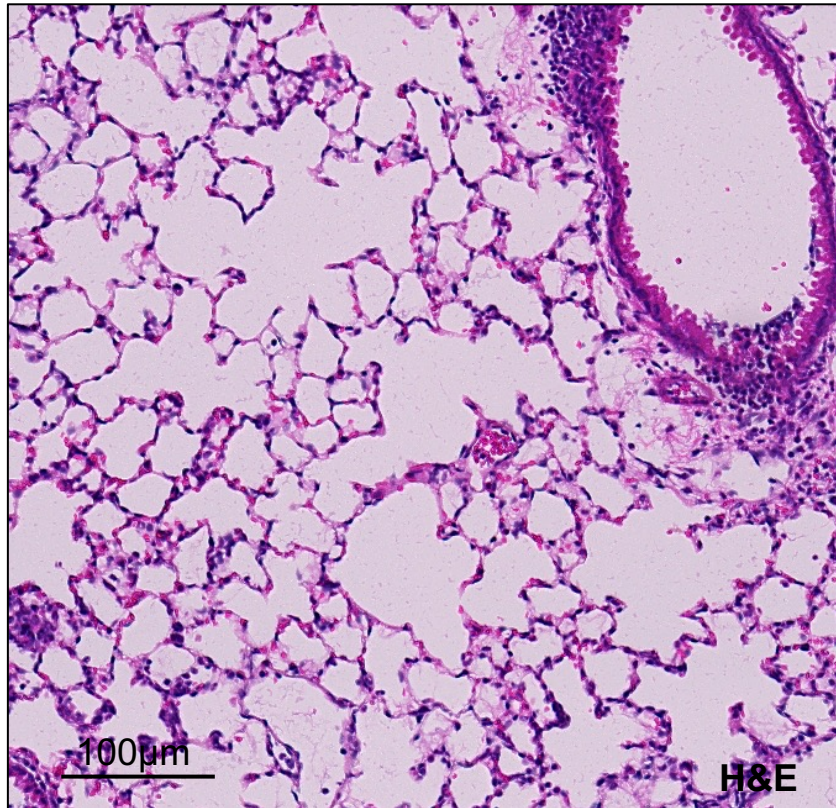

**Lung tissue (*P.a.*, *Adam8*<sup>+/+</sup>)**

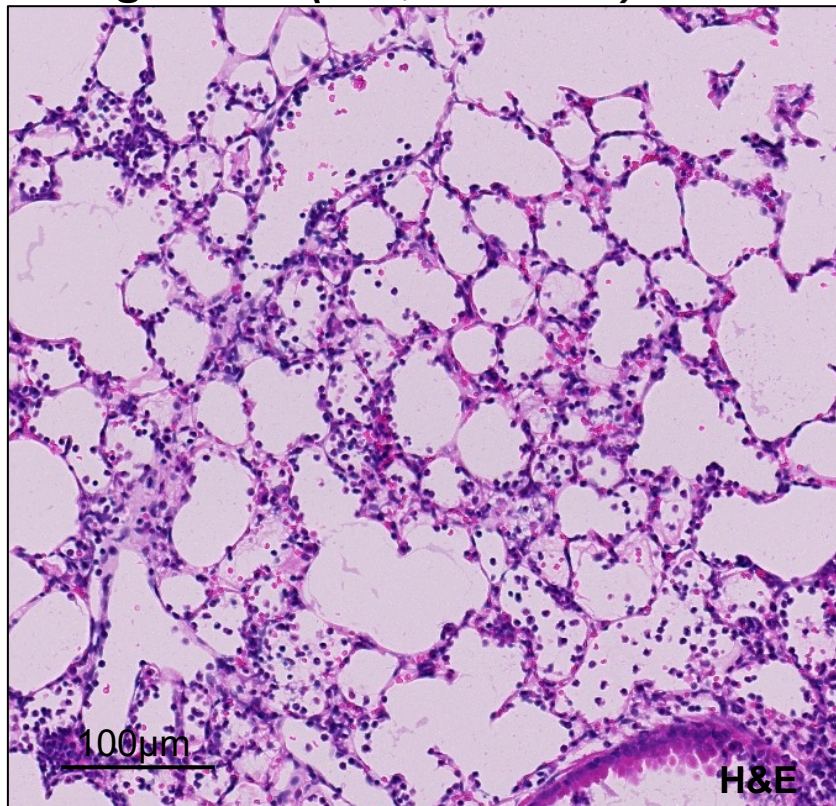

Supplemental Figure 12. Lower power field magnification of Figure 3G.

**Lung tissue (*P.a.* + BK1361)**

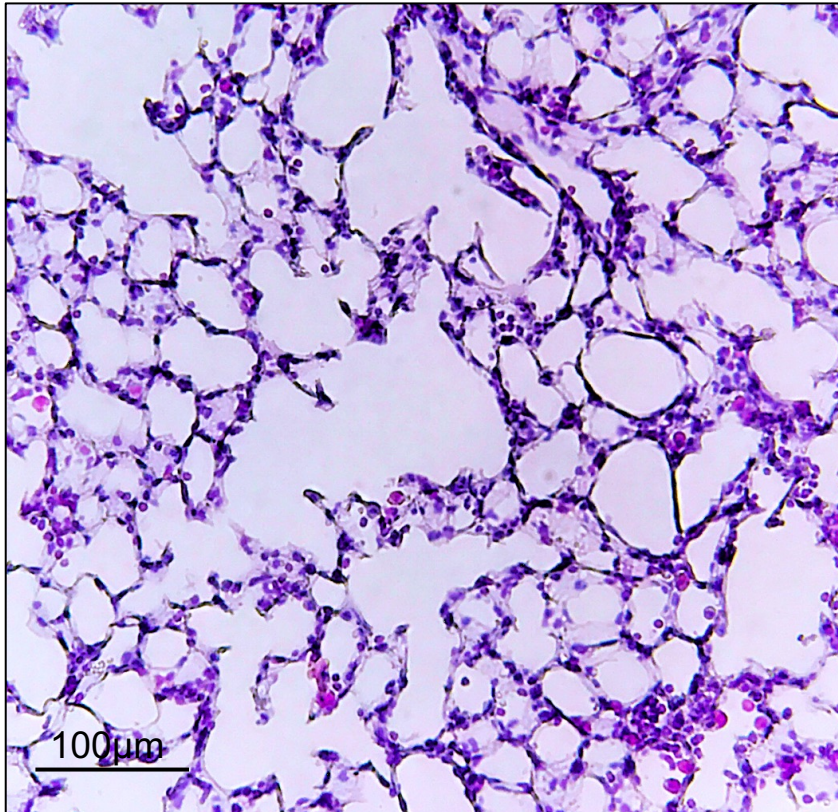

**Lung tissue (*P.a.* + CP)**

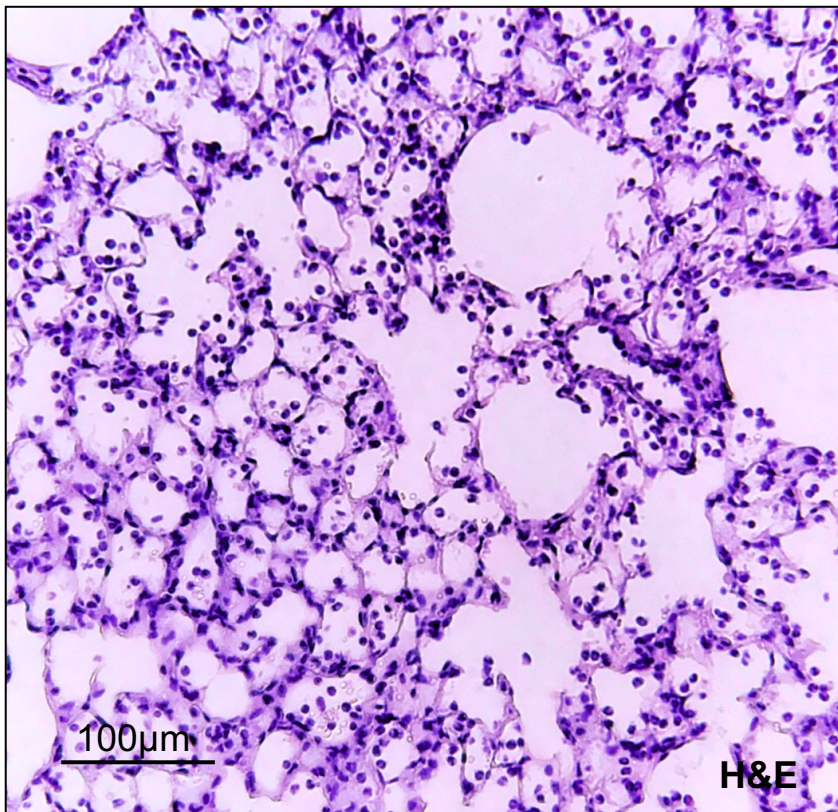

Lower powerfield magnification of Figure 3R.



**Control**

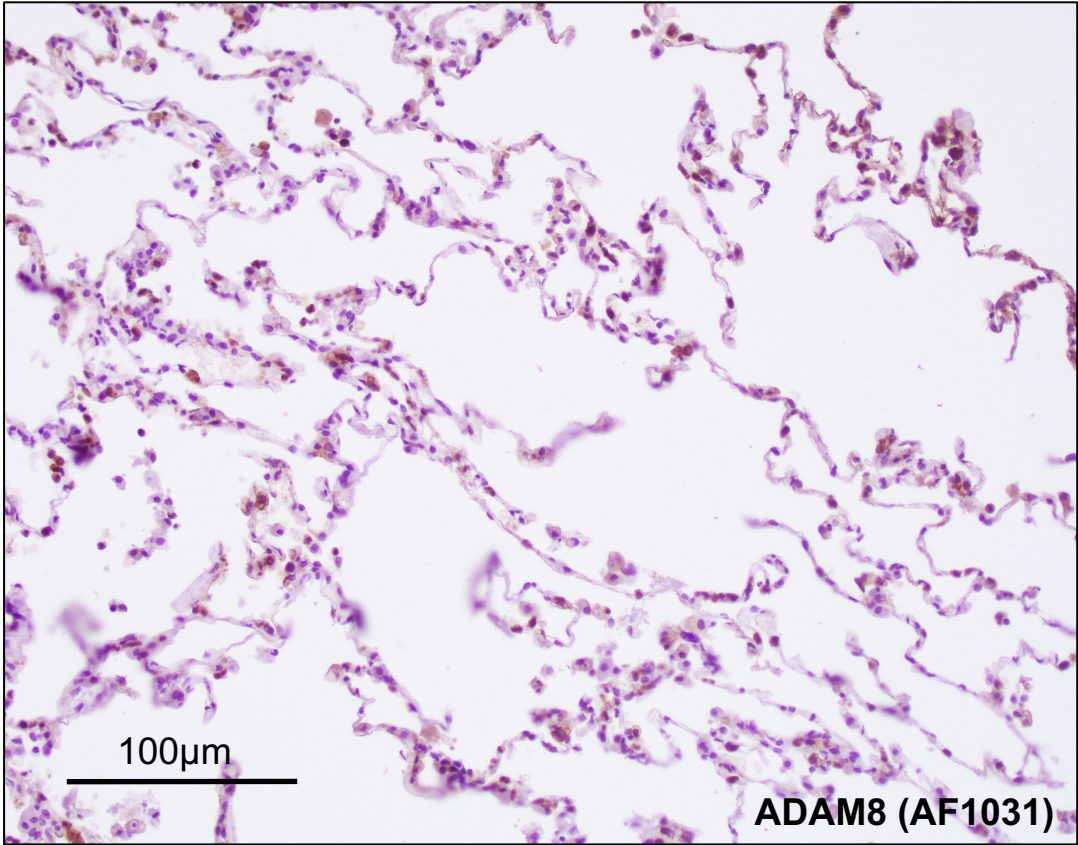

**ARDS**

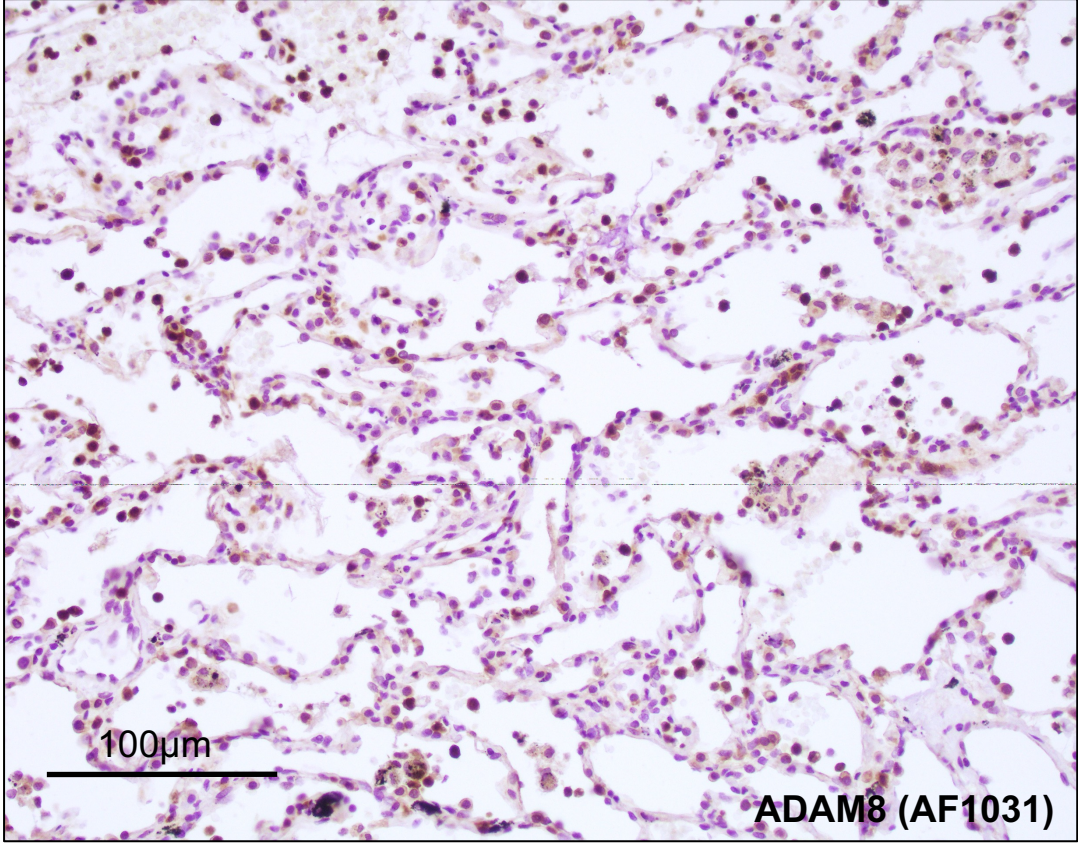

Lower powerfield magnification of Figure 4c.

**Lung tissue (PBS)**

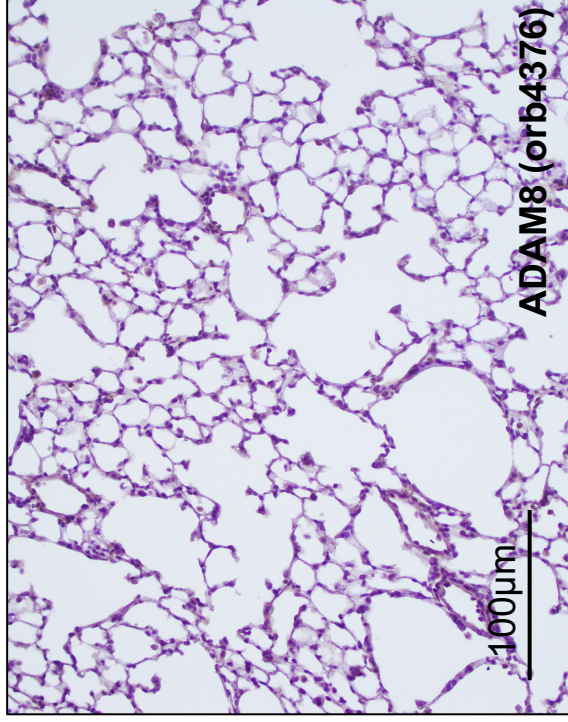

**Lung tissue (LPS)**

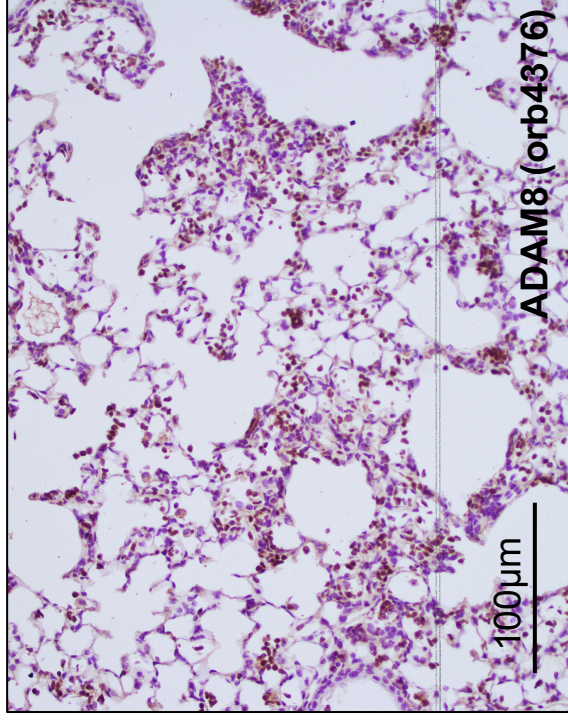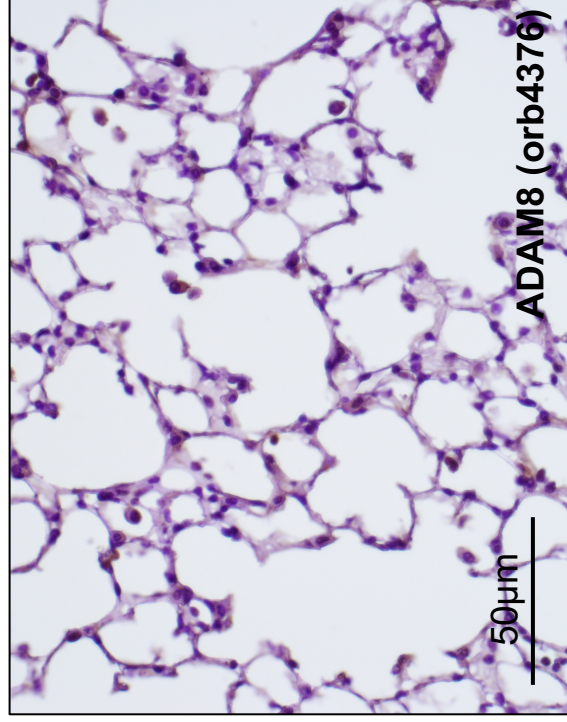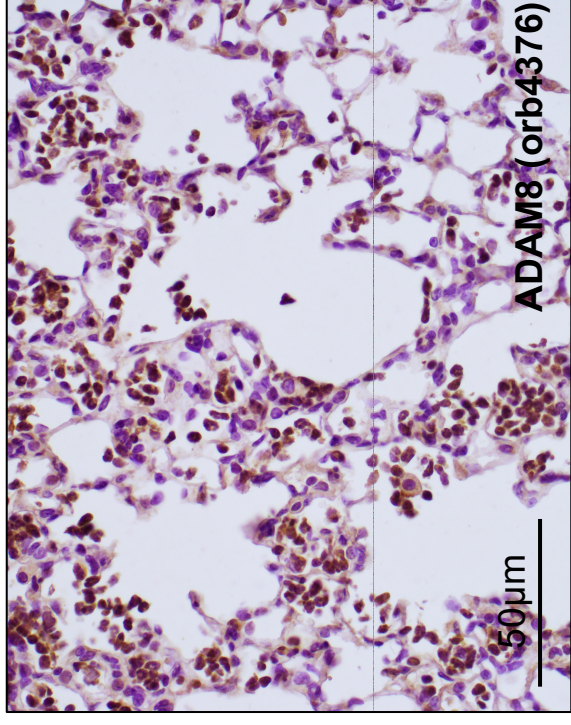

Lower powerfield magnification of Figure S4c.

**BAL (PBS)**

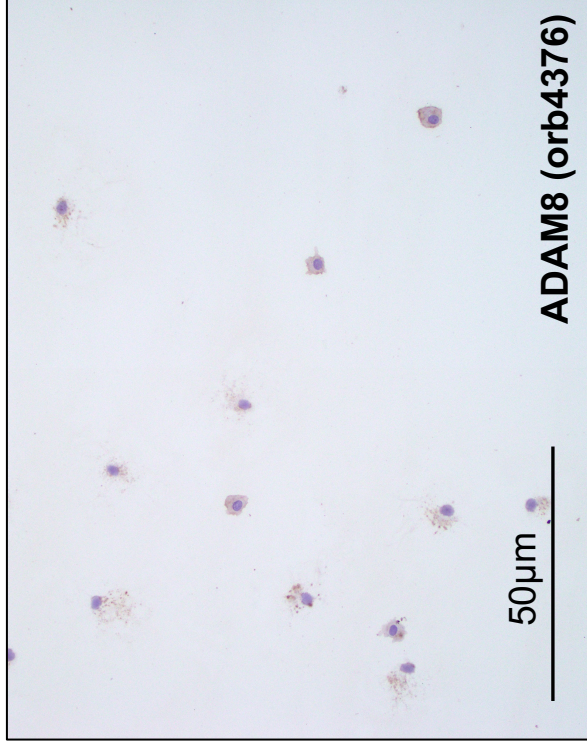

**BAL (LPS)**

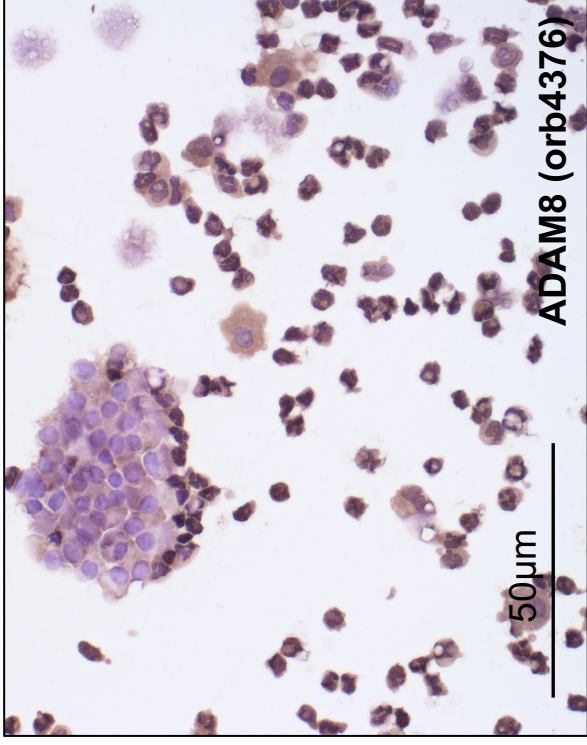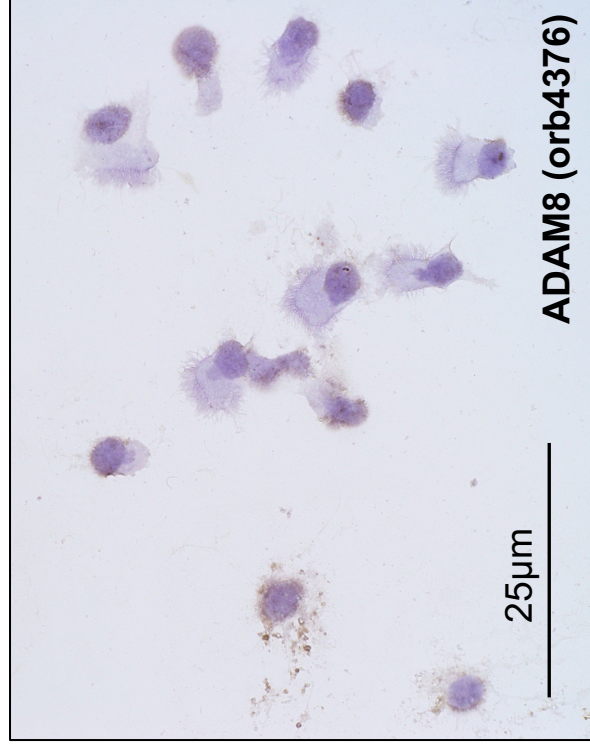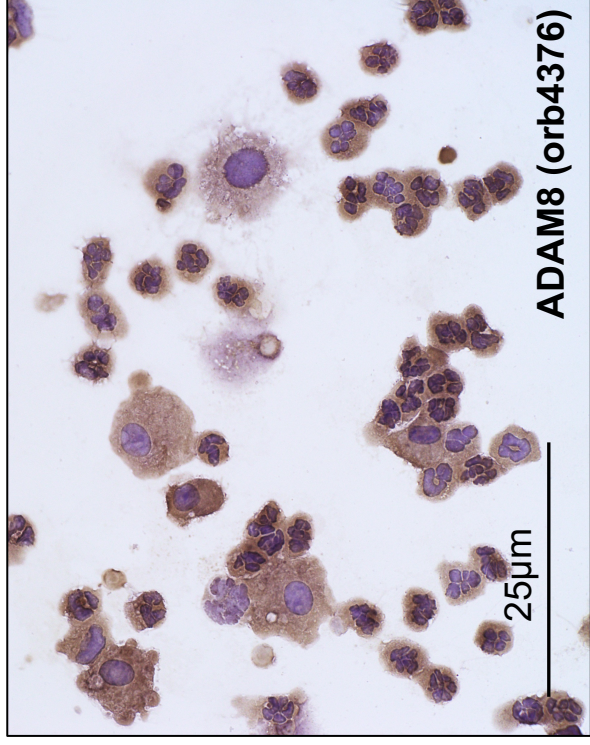

Lower powerfield magnification of Figure S4c.

| <b>Mouse Clinical Assessment Score for Sepsis (M-CASS)</b> |              |                        |                                       |                                                 |
|------------------------------------------------------------|--------------|------------------------|---------------------------------------|-------------------------------------------------|
| <b>Score</b>                                               | <b>1</b>     | <b>2</b>               | <b>3</b>                              | <b>4</b>                                        |
| <b>Fur Aspect</b>                                          | Normal fur   | Slightly ruffled fur   | Ruffled fur                           | Ruffled fur and piloerection                    |
| <b>Activity</b>                                            | Normal       | Reduced                | Only when provoked                    | Little or none with provocation                 |
| <b>Posture</b>                                             | Normal       | Hunched, moving freely | Hunched, strained or stiff movement   | Hunched, little or no movement                  |
| <b>Behavior</b>                                            | Normal       | Slow                   | Abnormal when disturbed or provoked   | Abnormal, no relocation                         |
| <b>Chest Movements</b>                                     | Normal       | Mild dyspnea           | Moderate dyspnea                      | Severe dyspnea                                  |
| <b>Eyelids</b>                                             | Normal, open | Opened when disturbed  | Partially closed, even when disturbed | Mostly or completely closed, even when provoked |

**Table S1:** Surrogate endpoint scoring systems for assessing disease severity in mice. Mouse Clinical Assessment Score for Sepsis (M-CASS).

| Act ADAM8 [nM] | Sex | Age | ARDS etiology                                              | BAL cells                                      | Outcome                                 |
|----------------|-----|-----|------------------------------------------------------------|------------------------------------------------|-----------------------------------------|
| 0.830          | F   | 61  | Pneumonia (bacterial)                                      | 78% PMN<br>14% Macrophages<br>8% Lymphocytes   | non-survivor                            |
| 0.634          | M   | 55  | Pneumonia (viral)                                          | 62% PMN<br>11% Macrophages<br>7% Lymphocytes   | non-survivor                            |
| 0.516          | M   | 47  | Pneumonia (bacterial, viral)                               | 82% PMN<br>13% Macrophages<br>5% Lymphocytes   | non-survivor                            |
| 0.472          | F   | 52  | Pneumonia (bacterial, viral, fungal)                       | 87% PMN<br>11% Macrophages<br>7% Lymphocytes   | non-survivor                            |
| 0.403          | F   | 51  | Pneumonia (viral)                                          | 85% PMN<br>4% Macrophages<br>9% Lymphocytes    | non-survivor                            |
| 0.399          | F   | 56  | Pneumonia (bacterial, viral)                               | 73% PMN<br>26% Macrophages<br>1% Lymphocytes   | non-survivor                            |
| 0.368          | F   | 30  | Pneumonia (bacterial, viral)                               | 71% PMN<br>19 % Macrophages<br>10% Lymphocytes | survivor                                |
| 0.340          | M   | 40  | Pneumonia (bacterial, viral)                               | N/A                                            | survivor                                |
| 0.298          | M   | 50  | Pneumonia (bacterial, viral)<br>pre-existing lung fibrosis | 51% PMN<br>42% Macrophages<br>7% Lymphocytes   | survivor, required lung transplantation |
| 0.211          | M   | 53  | Pneumonia (bacterial, viral)                               | 19% PMN<br>49% Macrophages<br>30% Lymphocytes  | survivor                                |
| 0.177          | F   | 24  | Healthy                                                    | N/A                                            | control                                 |
| 0.139          | M   | 20  | Pneumonia (bacterial, viral)                               | 71% PMN<br>19% Macrophages<br>7% Lymphocytes   | survivor                                |
| 0.139          | M   | 27  | Healthy                                                    | N/A                                            | control                                 |
| 0.095          | M   | 23  | Healthy                                                    | N/A                                            | control                                 |
| 0.077          | F   | 23  | Healthy                                                    | N/A                                            | control                                 |

**Table S2:** Summary of clinical data of patients with ARDS due to pneumonia.

| Act ADAM8 [nM] | PGD    | Sex | Age | Transplant indication        | BAL cells                                    | MV [d] | ICU stay [d] |
|----------------|--------|-----|-----|------------------------------|----------------------------------------------|--------|--------------|
| 1.310          | Severe | F   | 63  | Non-IPF ILD                  | 87% PMN<br>13% Macrophages<br>0% Lymphocytes | 33     | 42           |
| 1.15           | Severe | F   | 21  | Chronic transplant rejection | 0% PMN<br>100% Macrophages<br>0% Lymphocytes | N/A    | 28           |
| 0.897          | Severe | M   | 68  | IPF                          | 90% PMN<br>6% Macrophages<br>4% Lymphocytes  | 2      | 8            |
| 0.698          | Severe | M   | 67  | Non-IPF ILD                  | 52% PMN<br>48% Macrophages<br>0% Lymphocytes | 46     | 50           |
| 0.560          | Mild   | F   | 54  | Non-IPF ILD                  | 55% PMN<br>45% Macrophages<br>0% Lymphocytes | 5      | 13           |
| 0.558          | Severe | M   | 70  | IPF                          | N/A                                          | N/A    | N/A          |
| 0.497          | Severe | M   | 66  | NSIP                         | 21% PMN<br>78% Macrophages<br>1% Lymphocytes | 41     | 31           |
| 0.447          | Severe | F   | 32  | CTD-ILD                      | 72% PMN<br>27% Macrophages<br>1% Lymphocytes | 40     | 40           |
| 0.444          | Severe | M   | 61  | COPD                         | 47% PMN<br>53% Macrophages<br>0% Lymphocytes | 28     | 35           |
| 0.332          | Severe | F   | 60  | Non-IPF ILD                  | 74% PMN<br>21% Macrophages<br>5% Lymphocytes | 57     | 48           |
| 0.324          | Mild   | M   | 63  | CTD-ILD                      | N/A                                          | 2      | 4            |
| 0.282          | Mild   |     | 51  | Non-IPF ILD                  | 48% PMN<br>49% Macrophages<br>3% Lymphocytes | 3      | 6            |
| 0.278          | Severe | M   | 66  | IPF                          | 75% PMN<br>23% Macrophages<br>2% Lymphocytes | 4      | 6            |
| 0.264          | Mild   | F   | 50  | CF                           | 30% PMN<br>68% Macrophages<br>1% Lymphocytes | 1      | 3            |
| 0.248          | Severe | F   | 33  | PAH (idiopathic)             | N/A                                          | N/A    | 18           |
| 0.214          | Mild   | M   | 69  | IPF                          | N/A                                          | 1      | 5            |
| 0.195          | Severe | F   | 74  | Non-IPF ILD                  | 81% PMN<br>17% Macrophages<br>2% Lymphocytes | 1      | 5            |
| 0.194          | Severe | M   | 68  | IPF                          | 88% PMN<br>11% Macrophages<br>1% Lymphocytes | N/A    | 14           |
| 0.153          | Mild   | F   | 41  | CF                           | 54% PMN<br>44% Macrophages<br>2% Lymphocytes | 1      | 4            |
| 0.15           | Mild   | F   | 65  | IPF                          | 71% PMN<br>24% Macrophages<br>5% Lymphocytes | 1      | 5            |
| 0.145          | Mild   | M   | 57  | Non-IPF ILD                  | 20% PMN<br>75% Macrophages<br>5% Lymphocytes | 1      | 7            |
| 0.141          | Severe | M   | 33  | NSIP                         | 79% PMN<br>21% Macrophages<br>3% Lymphocytes | 2      | 7            |
| 0.141          | Mild   | M   | 70  | COPD                         | N/A                                          | 0      | 7            |
| 0.121          | Mild   | F   | 31  | CF                           | 55% PMN<br>43% Macrophages<br>4% Lymphocytes | 4      | 8            |

**Table S3**

|        |        |   |    |                                 |                                              |     |     |
|--------|--------|---|----|---------------------------------|----------------------------------------------|-----|-----|
| 0.114  | Mild   | M | 70 | Hypersensitivity<br>Pneumonitis | 53% PMN<br>45% Macrophages<br>2% Lymphocytes | 2   | 4   |
| 0.085  | Mild   | M | 69 | IPF                             | 80% PMN<br>18% Macrophages<br>2% Lymphocytes | 4   | 6   |
| 0.0797 | Severe | M | 49 | CTD-ILD                         | 77% PMN<br>21% Macrophages<br>3% Lymphocytes | 3   | 7   |
| 0.0751 | Mild   | M | 68 | Sarcoidosis                     | N/A                                          | 2   | 5   |
| 0.067  | Severe | M | 48 | Chronic transplant<br>rejection | 86% PMN<br>13% Macrophages<br>1% Lymphocytes | 2   | 12  |
| 0.0653 | Mild   | F | 61 | COPD                            | N/A                                          | N/A | 5   |
| 0.047  | Mild   | M | 49 | CF                              | N/A                                          | 1   | 5   |
| 0.019  | Mild   | M | 42 | Non-IPF ILD                     | N/A                                          | 21  | N/A |

**Table S3:** Summary of clinical data of patients with ARDS due to Primary Graft Dysfunction (PGD). IPF, idiopathic fibrosis; ILD, Interstitial Lung Disease; NSIP, Non-specific interstitial pneumonia; CTD; Connective Tissue Disease; COPD, Chronic obstructive pulmonary disease; CF, Cystic fibrosis; PAH, Pulmonary arterial hypertension.

**Supplemental Table 4. Table of Key Resources**

| REAGENT/RESOURCE                                      | SOURCE                                                                   | IDENTIFIER                           |
|-------------------------------------------------------|--------------------------------------------------------------------------|--------------------------------------|
| <b>Antibodies</b>                                     |                                                                          |                                      |
| eFluor450-conjugated Mouse CD11c (Clone: 418)         | ThermoFisher                                                             | Cat # 48-0114-82, RRID: AB_464940    |
| FITC-conjugated Mouse CD11b (Clone: M1/70)            | ThermoFisher                                                             | Cat # 14-0112-82, RRID: AB_467108    |
| PE-conjugated Mouse CD86 (Clone: B7-2)                | ThermoFisher                                                             | Cat # 12-0862-82, RRID: AB_465768    |
| APC-conjugated Mouse Ly6G (Clone: 1A8)                | ThermoFisher                                                             | Cat # 17-9668-82, RRID: AB_2573307   |
| PerCP-Cy5.5-conjugated Mouse CD45 (Clone: 30-F11)     | BioLegend                                                                | Cat # 103131, RRID: AB_893344        |
| PE-Cy7-conjugated Mouse F4/80 (Clone: BM8)            | ThermoFisher                                                             | Cat # 25-4801-82, RRID: AB_469653    |
| Human ADAM8 ectodomain (Clone: 143303)                | R&D Systems                                                              | Cat # MAB1031, RRID: AB_2305036      |
| Human ADAM8 Polyclonal Ectodomain Antibody            | R&D Systems                                                              | Cat # AF1031, RRID: AB_354549        |
| Human ADAM8 Polyclonal Cytoplasmic Domain Antibody    | LSBio                                                                    | Cat # LS-B4068-50, RRID: AB_10718869 |
| Mouse IgG2B Isotype Control (Clone: 20116)            | R&D Systems                                                              | Cat # MAB004, RRID: AB_357346        |
| Human Myo1f Polyclonal Antibody                       | Biorbyt                                                                  | Cat # orb221550                      |
| Anti-Goat IgG H&L (Alexa Fluor® 568)                  | Abcam                                                                    | Cat # ab175474, RRID: AB_2636995     |
| Anti-Rabbit IgG H&L (Alexa Fluor® 488)                | Abcam                                                                    | Cat # ab150077, RRID: AB_2630356     |
| Anti-Rabbit IgG, HRP-linked Antibody                  | Cell Signaling                                                           | Cat # 7074, RRID: AB_2099233         |
| Anti-Mouse IgG, HRP-linked Antibody                   | Cell Signaling                                                           | Cat # 7076, RRID: AB_330924          |
| Anti-Goat IgG, HRP-linked Antibody                    | ThermoFisher                                                             | Cat # PA1-28664, RRID: AB_10990162   |
| Mouse Myeloperoxidase Polyclonal                      | R&D Systems                                                              | Cat # AF3667, RRID: AB_2250866       |
| Mouse ADAM8 Polyclonal                                | R&D Systems                                                              | Cat # orb4376, RRID: AB_10948754     |
| Mouse Ly6G (Clone: 1A8)                               | Bio X Cell                                                               | Cat # BE0075-1, RRID: AB_1107721     |
| Mouse S100A8                                          | R&D Systems                                                              | Cat # AF3059, RRID: AB_2184254       |
| Anti-Rat IgG, Cy3 linked Antibody                     | Jackson ImmunoResearch                                                   | Cat # 712-165-153, RRID: AB_2340667  |
| Anti-Goat IgG, AF488 linked Antibody                  | Jackson ImmunoResearch                                                   | Cat # 705-545-003, RRID: AB_2340428  |
| Hoechst 33342 Solution                                | ThermoFisher                                                             | Cat # 62249                          |
| DAPI (4',6-Diamidino-2-Phenylindole, Dihydrochloride) | ThermoFisher                                                             | Cat # D1306                          |
| Fixable Yellow Dead Cell Stain                        | ThermoFisher                                                             | Cat # L34967                         |
| <b>Bacterial and Virus Strains</b>                    |                                                                          |                                      |
| <i>Pseudomonas aeruginosa</i> (Strain PA103)          | ATCC                                                                     | ATCC 29260                           |
| <b>Biological Samples</b>                             |                                                                          |                                      |
| Lung fluids of patients with ARDS due to pneumonia    | Universities of Giessen and Marburg Lung Center, Pneumonia Biorepository | UGMLC/DLZ, Az 58/15 / Az 87/12       |
| Lung fluids of healthy volunteers                     | Universities of Giessen and Marburg Lung Center                          | UGMLC/DLZ, Az 58/15 / Az 87/12       |
| Lung fluids of patients with ARDS due to PGD          | University of California, San Francisco, Lung Transplant Biorepository   | IRB # 13-10738                       |
| Lung tissue from ARDS and non-ARDS patients           | University of Texas Health and Science Center, Houston                   | IRB # HSC-MS-08-0354                 |
| <b>Chemicals, Peptides, and Recombinant Proteins</b>  |                                                                          |                                      |
| N-Formyl-Met-Leu-Phe (fMLP)                           | Sigma                                                                    | Cat # F3506                          |
| Lipopolysaccharide (O111:B4)                          | Sigma                                                                    | Cat # L4391                          |
| Mouse TNF $\alpha$                                    | GenScript                                                                | Cat # Z03333                         |
| Mouse Cxcl-1/KC                                       | GenScript                                                                | Cat # Z02899                         |
| Human TNF $\alpha$                                    | GenScript                                                                | Cat # Z01001                         |
| Human IL-8                                            | GenScript                                                                | Cat # Z03061                         |
| Batimastat (BB-94)                                    | Sigma                                                                    | Cat # SML0041                        |



|                                                                                |                                  |                                                                                         |
|--------------------------------------------------------------------------------|----------------------------------|-----------------------------------------------------------------------------------------|
| cOmplete Protease Inhibitor                                                    | Roche                            | Cat # 11697498001                                                                       |
| TRIZol Reagent                                                                 | ThermoFisher                     | Cat # 15596026                                                                          |
| Matrigel                                                                       | Corning                          | Cat # 356237                                                                            |
| <b>Critical Commercial Assays</b>                                              |                                  |                                                                                         |
| Mouse Myeloperoxidase ELISA                                                    | R&D Systems                      | Cat # DY3667                                                                            |
| Mouse Cxcl-1 ELISA                                                             | R&D Systems                      | Cat # DY453                                                                             |
| Mouse TNF $\alpha$ ELISA                                                       | R&D Systems                      | Cat # DY410                                                                             |
| Mouse ADAM8 ELISA                                                              | Biomatik                         | Cat # EKU02052                                                                          |
| Mouse Albumin ELISA                                                            | Bethyl Laboratories              | Cat # E90-134                                                                           |
| Human ADAM8 ELISA                                                              | R&D Systems                      | Cat # DY1031                                                                            |
| Human Myeloperoxidase ELISA                                                    | R&D Systems                      | Cat # DY3174                                                                            |
| Pierce BCA Protein Assay Kit                                                   | ThermoFisher                     | Cat # 23225                                                                             |
| Dynabeads Antibody Coupling Kit                                                | ThermoFisher                     | Cat # 14311D                                                                            |
| VECTASTAIN Elite ABC-HRP Kit, Peroxidase (goat IgG)                            | Vector Laboratories              | Cat # PK-6105                                                                           |
| VECTASTAIN Elite ABC-HRP Kit, Peroxidase (Rabbit IgG)                          | Vector Laboratories              | Cat # PK-6101                                                                           |
| DAB Substrate Kit                                                              | Vector Laboratories              | Cat # SK-4100                                                                           |
| pHrodo Green <i>E. coli</i> BioParticles                                       | ThermoFisher                     | Cat # P35366                                                                            |
| High Capacity cDNA Reverse Transcription Kit                                   | ThermoFisher                     | Cat # 4368814                                                                           |
| Power SYBR Green PCR Master Mix                                                | ThermoFisher                     | Cat # 4368706                                                                           |
| TaqMan Fast Advanced Master Mix                                                | ThermoFisher                     | Cat # 4444556                                                                           |
| $\mu$ -Slide Chemotaxis                                                        | Ibidi                            | Cat # 80326                                                                             |
| 6.5mm Transwell Insert, 8 $\mu$ m Pore Size                                    | Corning                          | Cat # 3422                                                                              |
| <b>Deposited Data</b>                                                          |                                  |                                                                                         |
| GTEx Analysis Release V8 (dbGaP Accession phs000424.v8.p2), ENSG00000151651.15 | GTExPortal                       | <a href="https://gtexportal.org/home/datasets">https://gtexportal.org/home/datasets</a> |
| <b>Experimental Models: Cell Lines</b>                                         |                                  |                                                                                         |
| Mouse: Brain-derived Endothelial Cells (b.End3), p5                            | ATCC                             | ATCC CRL-2299                                                                           |
| Human: Microvascular Endothelial Cells (HMEC-1), p9                            | ATCC                             | ATCC CRL-3243                                                                           |
| Human: Leukocyte Cell Line (HL-60), p0                                         | ATCC                             | ATCC CRL-240, LOT: 64048671                                                             |
| <b>Experimental Models: Organisms/Strains</b>                                  |                                  |                                                                                         |
| Mouse: (WT) C57BL/6                                                            | Jackson Laboratory               | Cat# 000664; RRID: IMSR_JAX:000664                                                      |
| Mouse: (Adam8 ko), <i>Adam8</i> <sup>-/-</sup>                                 | A.J.P. Docherty, UCB, Slough, UK | N/A                                                                                     |
| Mouse: B6.Cg-Tg(S100A8-cre,-EGFP)1llw/J                                        | Jackson Laboratory               | Cat# 021614; RRID: IMSR_JAX:021614                                                      |
| Mouse: D2.129(Cg)-Gt(ROSA)26Sortm4(ACTB-tdTomato,-EGFP)Luo/SjJ                 | Jackson Laboratory               | Cat# 026862, RRID: IMSR_JAX:026862                                                      |
| <b>Oligonucleotides</b>                                                        |                                  |                                                                                         |
| Human ADAM8 KiCqStart Primers                                                  | Sigma                            | Cat # H_ADAM8_1                                                                         |
| Human ACTB KiCqStart Primers                                                   | Sigma                            | Cat # H_ACTB_1                                                                          |
| Human GAPDH KiCqStart Primers                                                  | Sigma                            | Cat # H_GAPDH_1                                                                         |
| Mouse IL1 $\beta$ TaqMan Gene Expression Assay (FAM)                           | Thermo Fisher                    | Cat # 4331182, Mm00434228_m1                                                            |
| Mouse TNF $\alpha$ TaqMan Gene Expression Assay (FAM)                          | Thermo Fisher                    | Cat # 4331182, Mm00443258_m1                                                            |
| Mouse GAPDH TaqMan Gene Expression Assay (FAM)                                 | Thermo Fisher                    | Cat # 4331182, Mm99999915_g1                                                            |
| Eukaryotic 18S TaqMan Gene Expression Assay (FAM)                              | ThermoFisher                     | Cat # 4331182, Hs03003631_g1                                                            |
| <b>Software and Algorithms</b>                                                 |                                  |                                                                                         |
| ImageJ Software                                                                | NIH                              | <a href="https://imagej.nih.gov/ij/">https://imagej.nih.gov/ij/</a>                     |
| FlowJo Software                                                                | TreeStar                         | <a href="https://www.flowjo.com/">https://www.flowjo.com/</a>                           |
| Imaris                                                                         | Oxford Instruments               | <a href="https://imaris.oxinst.com/">https://imaris.oxinst.com/</a>                     |
| GraphPad Prism V8 Software                                                     | GraphPad                         | <a href="https://www.graphpad.com/">https://www.graphpad.com/</a>                       |
| Matlab 2020b Software                                                          | MathWorks                        | <a href="https://www.mathworks.com">https://www.mathworks.com</a>                       |
